# Supplementary material for: Reflective multi-immersion microscope objectives inspired by the Schmidt telescope
Source: Nat Biotechnol. 2023 Mar 30;42(1):65–71. doi: 10.1038/s41587-023-01717-8 (PMC10791577; doi:10.1038/s41587-023-01717-8)
Supplement: Supplementary file 4 — Comparison to other imaging systems. [file 41587_2023_1717_MOESM4_ESM.xlsx]

## Sheet: Sheet1
Instrument	Reference	Modalities	Multi-immersion?	Reference Index	NA	FOV Diameter (mm)	WD (mm)	Capture Volume V_C (mm^3)*	X PSF (FWHM) in μm	Y PSF (FWHM) in μm	Z PSF (FWHM) in μm	PSF Volume V_PSF (mm^3)*	Information capacity (V_C / V_PSF)	Comments
Schmidt Objective	This Work	Multiphoton microscopy (750-1000 nm)	Yes	1.51	1.04	1.1	11	10.4536	0.36	0.32	1.36	8.20306e-11	1.27436e+11
Schmidt Objective	This Work	Multiphoton microscopy (750-1000 nm)	Yes	1.45	1	1.15	11	11.4256	0.36	0.33	1.33	8.27281e-11	1.3811e+11
Schmidt Objective	This Work	Multiphoton microscopy (750-1000 nm)	Yes	1.33	0.92	1.4	11	16.9332	0.42	0.43	1.65	1.56022e-10	1.08531e+11
Schmidt Objective	This Work	Multiphoton microscopy (750-1000 nm)	Yes	1	0.69	1.6	11	22.1168	0.56	0.49	1.93	2.77285e-10	7.97621e+10
Large FOV two-photon microscope	Tsai et al., Opt. Express 2015	Multiphoton microscopy	No	1.33	0.28	10	5	392.699	1.2	1.2	16	1.20633e-08	3.25531e+10
Mesolens	McConnell et al., eLife 2016	Epifluorescence, confocal, light-sheet	Yes	1.51	0.47	6	3.74	105.746	0.7	0.7	7	1.79589e-09	5.88823e+10
Thorlabs Multiphoton Mesoscope	Sofroniew et al, eLife 2016	Two-photon microscopy (900-1070 nm)	No	1.33	0.6	5	3	58.9048	0.66	0.66	4.09	9.32816e-10	6.31474e+10
Trepan2P	Stirman et al, Nat Biotech 2016	Two-photon microscopy (910 nm)	No	1.33		3.5	5.5	52.9162	1.2	1.2	12	9.0475e-09	5.84871e+09	WD is purely mechanical***
mesoSPIM (at Zoom 1)	Voigt et al, Nat Meth, 2019	Light-sheet microscopy	Yes	1.45	0.2	18.8	65	18043.4	8	8	5.57	1.86647e-07	9.66716e+10	13.33 x 13.3 mm FOV, WD is purely mechanical***
mesoSPIM (at Zoom 4)	Voigt et al, Nat Meth, 2019	Light-sheet microscopy	Yes	1.45	0.2	4.65	65	1103.85	3	3	5.57	2.62472e-08	4.20559e+10	3.29 x 3.29 mm FOV, WD is purely mechanical***
RUSH	Fan et al, Nat Phot 2019	Epifluorescence	No	1.33	0.35	14	19	2924.82	1.3	1.3	16	1.41577e-08	2.06589e+11	WD is purely mechanical***
Multi-beam two-photon microscope	Rumyantsev et al, Nature 2020	Multiphoton microscopy (<1000 nm)	No	1.33	0.5	2.8	19	116.993	1.2	1.2	8	6.03166e-09	1.93965e+10	WD is purely mechanical***
FASHIO-2PM	Ota et al, Neuron 2021	Multiphoton microscopy	No	1.33	0.4	4.24	4.5	63.5381	1.61	1.61	7.07	9.59524e-09	6.62183e+09
Diesel2P	Yu & Stirman et al. Nat Comm 2022	Two-photon microscopy (910 & 1050 nm)	No	1.33	0.54	6	8	226.195	1	1	8	4.18866e-09	5.40017e+10	WD is purely mechanical***
Cousa	Yu et al, bioRxiv 2022	Multiphoton microscopy (800-1300 nm)	No	1.33	0.5	4.3	1.3	18.8786	0.69	0.69	5.84	1.45578e-09	1.2968e+10
* Capture volume is the maximum volume that can be acquired in a single z-stack
** PSF volume was estimated as the volume of an ellipsoid with the PSF dimensions
*** This indicates that the objective is not designed for immersion, filling the available working distance would result in severe spherical aberration blurring the PSF - therefore, the
